# Supplementary material for: Size dependent droplet interfacial tension and surfactant transport in liquid–liquid systems, with applications in shipboard oily bilgewater emulsions
Source: Royal Society of Chemistry journal article supplement (doi:10.1039/c9sm01892a), 2020-01-01
Supplement: c9sm01892a1.pdf [file c9sm01892a1.pdf]

## Supplementary Information for

### Size dependent droplet interfacial tension and surfactant transport in liquid-liquid systems, with applications in shipboard oily bilgewater emulsions

Yun Chen and Cari S. Dutcher

**Table S1. Model parameters for selected surfactants**

| Surfactant                      | Type      | Model* | $\Gamma_{\infty}$<br>(mol/m <sup>2</sup> ) | $\kappa$<br>(m <sup>3</sup> /mol) | $k_{\text{ads}}$<br>(m <sup>3</sup> /mol·s) | References |
|---------------------------------|-----------|--------|--------------------------------------------|-----------------------------------|---------------------------------------------|------------|
| CTAB                            | cationic  | L      | $1.58 \times 10^{-6}$                      | 1.98                              | -                                           | 1          |
| STS                             | anionic   | L      | $9.24 \times 10^{-6}$                      | 2.48                              | -                                           | 1          |
| SDS                             | anionic   | m-L    | $8.96 \times 10^{-6}$                      | 0.28                              | 110                                         | 1, 2       |
| Aerosol-OT                      | anionic   | D      | $2.15 \times 10^{-6}$                      | $5.4 \times 10^5$                 | -                                           | 3          |
| C <sub>10</sub> DMPO            | non-ionic | L      | $3.6 \times 10^{-6}$                       | 23.4                              | -                                           | 1          |
| Decanol                         | non-ionic | L      | $8.8 \times 10^{-6}$                       | 25.6                              | -                                           | 1          |
| C <sub>10</sub> EO <sub>4</sub> | non-ionic | L      | $3.3 \times 10^{-6}$                       | 257                               | -                                           | 1          |
| TritonX-100                     | non-ionic | F      | $3.5 \times 10^{-6}$                       | 2220                              | -                                           | 1          |
| TritonX-165                     | non-ionic | L      | $2.3 \times 10^{-6}$                       | 1220                              | -                                           | 1          |
| Propanol                        |           | F      | $7.1 \times 10^{-6}$                       | $5.5 \times 10^{-3}$              | 1.1                                         | 2, 4       |
| Butanol                         |           | F      | $6 \times 10^{-6}$                         | $2.1 \times 10^{-2}$              | 1.6                                         | 2, 4       |
| Hexanol                         |           | F      | $6 \times 10^{-6}$                         | 0.19                              | 16                                          | 2, 4       |
| Heptanol                        |           | F      | $6.4 \times 10^{-6}$                       | 0.9                               | 100                                         | 2, 4       |
| Octanol                         |           | m-L    | $6 \times 10^{-6}$                         | 4.8                               | 310                                         | 2, 4       |
| n-decanol                       |           | L      | $6.5 \times 10^{-6}$                       | -                                 | 6.5                                         | 5          |
| C <sub>12</sub> E <sub>6</sub>  | non-ionic | F      | $3.5 \times 10^{-6}$                       | -                                 | 4                                           | 5          |
| C <sub>12</sub> E <sub>8</sub>  | non-ionic | F      | $6.8 \times 10^{-6}$                       | -                                 | 8.7                                         | 5          |
| C <sub>14</sub> E <sub>8</sub>  | non-ionic | F      | $2.7 \times 10^{-6}$                       | -                                 | 8                                           | 5          |
| PEG-PFPE                        | non-ionic | L      | $3.4 \times 10^{-6}$                       | 3000                              | 18                                          | 6          |

\*L: Langmuir isotherm; m-L: modified-Langmuir isotherm; D: Davies isotherm; F: Frumkin isotherm  
Caution should be used when comparing values calculated from different models.

- 1 N. Mucic, A. Javadi, N. M. Kovalchuk, E. V. Aksenenko and R. Miller, *Adv. Colloid Interface Sci.*, 2011, **168**, 167–178.
- 2 C. H. Chang and E. I. Franses, *Colloids Surfaces A Physicochem. Eng. Asp.*, 1995, **100**, 1–45.
- 3 S. S. Datwani and K. J. Stebe, *Langmuir*, 2001, **17**, 4287–4296.
- 4 C. H. Chang, N. H. L. Wang and E. I. Franses, *Colloids and Surfaces*, 1992, **62**, 321–332.
- 5 F. Jin, R. Balasubramaniam and K. J. Stebe, *J. Adhes.*, 2004, **80**, 773–796.
- 6 Q. Brosseau, J. Vrignon and J.-C. Baret, *Soft Matter*, 2014, **10**, 3066–3076.
